# Supplementary material for: Frailty in rheumatoid arthritis and its relationship with disease activity, hospitalisation and mortality: a longitudinal analysis of the Scottish Early Rheumatoid Arthritis cohort and UK Biobank
Source: HighWire-hosted journal article supplement (doi:10.1136/rmdopen-2021-002111), 2022-03-01
Supplement: rmdopen-2021-002111supp001_data_supplement.pdf [file rmdopen-2021-002111supp001_data_supplement.pdf]

## SERA frailty index deficits

| Deficit                              | Source          | Coding                                                                 |
|--------------------------------------|-----------------|------------------------------------------------------------------------|
| Alcohol problems                     | Medical history | Present = 1, absent = 0                                                |
| Anxiety                              | Medical history | Present = 1, absent = 0                                                |
| Asthma                               | Medical history | Present = 1, absent = 0                                                |
| Atrial fibrillation                  | Medical history | Present = 1, absent = 0                                                |
| Bronchiectasis                       | Medical history | Present = 1, absent = 0                                                |
| Cancer                               | Medical history | Present = 1, absent = 0                                                |
| Coronary heart disease               | Medical history | Present = 1, absent = 0                                                |
| Chronic kidney disease               | Medical history | Present = 1, absent = 0                                                |
| Chronic liver disease                | Medical history | Present = 1, absent = 0                                                |
| COPD                                 | Medical history | Present = 1, absent = 0                                                |
| Depression                           | Medical history | Present = 1, absent = 0                                                |
| Diabetes                             | Medical history | Present = 1, absent = 0                                                |
| Diverticular disease                 | Medical history | Present = 1, absent = 0                                                |
| Dyspepsia                            | Medical history | Present = 1, absent = 0                                                |
| Epilepsy                             | Medical history | Present = 1, absent = 0                                                |
| Glaucoma                             | Medical history | Present = 1, absent = 0                                                |
| Heart failure                        | Medical history | Present = 1, absent = 0                                                |
| Hypertension                         | Medical history | Present = 1, absent = 0                                                |
| Osteoporosis                         | Medical history | Present = 1, absent = 0                                                |
| Chronic pain                         | Medical history | Present = 1, absent = 0                                                |
| Parkinson's disease                  | Medical history | Present = 1, absent = 0                                                |
| Pernicious anaemia                   | Medical history | Present = 1, absent = 0                                                |
| Peripheral vascular disease          | Medical history | Present = 1, absent = 0                                                |
| Schizophrenia                        | Medical history | Present = 1, absent = 0                                                |
| Stroke or TIA                        | Medical history | Present = 1, absent = 0                                                |
| Thyroid disease                      | Medical history | Present = 1, absent = 0                                                |
| Difficulty getting out of bed        | HAQ-DI          | Severe difficulty/unable = 1, some difficulty = 0.5, no difficulty = 0 |
| Difficulty with household chores     | HAQ-DI          | Severe difficulty/unable = 1, some difficulty = 0.5, no difficulty = 0 |
| Difficulty climbing stairs           | HAQ-DI          | Severe difficulty/unable = 1, some difficulty = 0.5, no difficulty = 0 |
| Difficulty with shopping (groceries) | HAQ-DI          | Severe difficulty/unable = 1, some difficulty = 0.5, no difficulty = 0 |
| Difficult standing                   | HAQ-DI          | Severe difficulty/unable = 1, some difficulty = 0.5, no difficulty = 0 |
| Difficulty with toilet               | HAQ-DI          | Severe difficulty/unable = 1, some difficulty = 0.5, no difficulty = 0 |

|                             |                              |                                                                        |
|-----------------------------|------------------------------|------------------------------------------------------------------------|
| Limited mobility            | EQ5D-1                       | Severe difficulty/unable = 1, some difficulty = 0.5, no difficulty = 0 |
| Difficulty with self-care   | EQ5D-2                       | Severe difficulty/unable = 1, some difficulty = 0.5, no difficulty = 0 |
| Limited in usual activities | EQ5D-3                       | Severe difficulty/unable = 1, some difficulty = 0.5, no difficulty = 0 |
| Pain                        | EQ5D-4                       | Severe difficulty/unable = 1, some difficulty = 0.5, no difficulty = 0 |
| Anxiety                     | EQ5D-5                       | Severe difficulty/unable = 1, some difficulty = 0.5, no difficulty = 0 |
| eGFR                        | baseline laboratory measures | <30 = 1, <60 = 0.5, >60 = 0                                            |
| Haemoglobin                 | baseline laboratory measures | <115 = 1 (men), <110 = 1 (women)                                       |
| Platelets                   | baseline laboratory measures | <150 = 1, >150 = 0                                                     |

### UK Biobank frailty index deficits

| Deficit                                                      | Coding                                                                           |
|--------------------------------------------------------------|----------------------------------------------------------------------------------|
| Glaucoma                                                     | Categorised 0/1                                                                  |
| Cataracts                                                    | Categorised 0/1                                                                  |
| Hearing difficulty                                           | Categorised 0/1                                                                  |
| Migraine                                                     | Categorised 0/1                                                                  |
| Dental problems                                              | Categorised 0/1 for none vs. any                                                 |
| Self-rated health                                            | 0 – excellent; 0.25 – good; 0.5 - fair, 1 - poor                                 |
| Fatigue: frequency of tiredness / lethargy in last two weeks | 0, 0.25, 0.5, 1, respectively                                                    |
| Sleep: experience of sleeplessness/insomnia                  | Categorised 0, 0.5, 1, respectively                                              |
| Depressed feelings: frequency in last two weeks              | 0 – not at all, 0.5 – several days, 0.75 -- more than half, 1 – nearly every day |
| Self-described nervous personality                           | Categorised 0/1                                                                  |
| Severe anxiety/ panic attacks                                | Categorised 0/1                                                                  |
| Common to feel loneliness                                    | Categorised 0/1                                                                  |
| Sense of misery (ever/never)                                 | Categorised 0/1                                                                  |
| Infirmity: long-standing illness or disability               | Categorised 0/1                                                                  |
| Falls in last year                                           | 0 - no fall, 0.5 - one fall, 1 - more than one fall                              |
| Fractures/broken bones in last five years                    | Categorised 0/1                                                                  |
| Diabetes                                                     | Categorised 0/1                                                                  |
| Myocardial infarction                                        | Categorised 0/1                                                                  |
| Angina                                                       | Categorised 0/1                                                                  |
| Stroke                                                       | Categorised 0/1                                                                  |

|                                              |                 |
|----------------------------------------------|-----------------|
| High blood pressure                          | Categorised 0/1 |
| Hypothyroidism                               | Categorised 0/1 |
| Deep-vein thrombosis                         | Categorised 0/1 |
| High cholesterol                             | Categorised 0/1 |
| Breathing: wheeze in last year               | Categorised 0/1 |
| Pneumonia                                    | Categorised 0/1 |
| Chronic bronchitis/emphysema                 | Categorised 0/1 |
| Asthma                                       | Categorised 0/1 |
| Rheumatoid arthritis                         | Categorised 0/1 |
| Osteoarthritis                               | Categorised 0/1 |
| Gout                                         | Categorised 0/1 |
| Osteoporosis                                 | Categorised 0/1 |
| Hayfever, allergic rhinitis or eczema        | Categorised 0/1 |
| Psoriasis                                    | Categorised 0/1 |
| Any cancer diagnosis                         | Categorised 0/1 |
| Multiple cancers diagnosed (number reported) | Categorised 0/1 |
| Chest pain                                   | Categorised 0/1 |
| Head and/or neck pain                        | Categorised 0/1 |
| Back pain                                    | Categorised 0/1 |
| Stomach/abdominal pain                       | Categorised 0/1 |
| Hip pain                                     | Categorised 0/1 |
| Knee pain                                    | Categorised 0/1 |
| Whole-body pain                              | Categorised 0/1 |
| Facial pain                                  | Categorised 0/1 |
| Sciatica                                     | Categorised 0/1 |
| Gastric reflux                               | Categorised 0/1 |
| Hiatus hernia                                | Categorised 0/1 |
| Gall stones                                  | Categorised 0/1 |
| Diverticulitis                               | Categorised 0/1 |

## UK Biobank frailty phenotype – comparison of participants with and without missing data

|                         | Complete data (frailty phenotype) | Missing data (frailty phenotype) |
|-------------------------|-----------------------------------|----------------------------------|
| Total                   | 3344                              | 262                              |
| Mean age (sd)           | 59.4 (7.1)                        | 60.4 (6.7)                       |
| Male (%)                | 998 (29.8%)                       | 65 (24.8%)                       |
| Female (%)              | 2346 (70.2%)                      | 196 (74.8%)                      |
| Mean frailty index (sd) | 0.18 (0.08)                       | 0.20 (0.08)                      |
